# Supplementary material for: Developmental mechanism of the periodic membrane skeleton in axons
Source: eLife journal article supplement (doi:10.7554/elife.04581), 2014-12-23
Supplement: supp [file elife-04581-supp-v1.zip]

Archive with 13 entries (13 files):
- elife_poa_e04581_Figure_1_Figure_Supplement_3.pdf
- elife_poa_e04581_Figure_3_Figure_Supplement_1.pdf
- elife_poa_e04581_Figure_4_Figure_Supplement_1.pdf
- elife_poa_e04581_Figure_1_Figure_Supplement_5.pdf
- elife_poa_e04581_Figure_1_Figure_Supplement_2.pdf
- elife_poa_e04581_Figure_1_Figure_Supplement_4.pdf
- elife_poa_e04581_Figure_1_Figure_Supplement_1.pdf
- elife_poa_e04581_Figure_7_Figure_Supplement_1.pdf
- elife_poa_e04581_Figure_6_Figure_Supplement_1.pdf
- elife_poa_e04581_Figure_7_Figure_Supplement_2.pdf
- elife_poa_e04581_Figure_1_Figure_Supplement_6.pdf
- elife_poa_e04581_Figure_5_Figure_Supplement_1.pdf
- elife_poa_e04581_Figure_4_Figure_Supplement_2.pdf
