# Supplementary figures and images for: Developmental mechanism of the periodic membrane skeleton in axons
Source: eLife journal article supplement (doi:10.7554/elife.04581), 2014-12-23

Figure 4 - Figure supplement 2

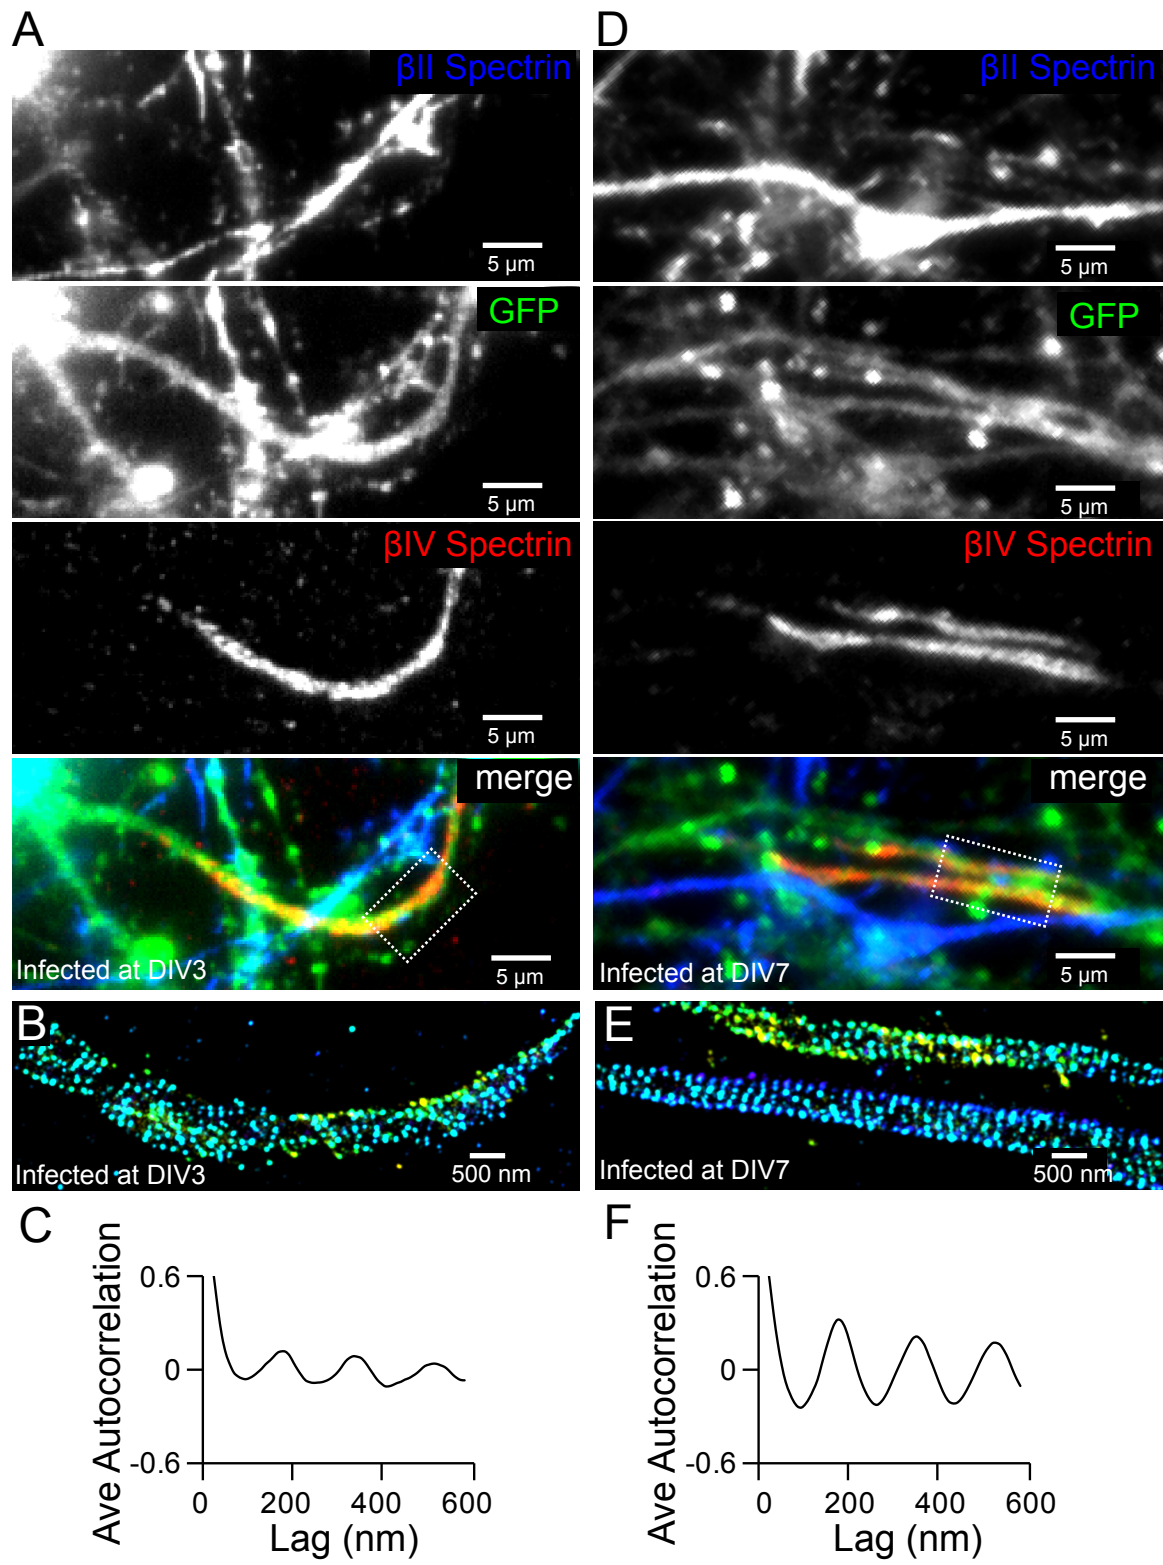

Supplement: supp [file elife-04581-supp-v1.zip]

Figure 1 - Figure supplement 3

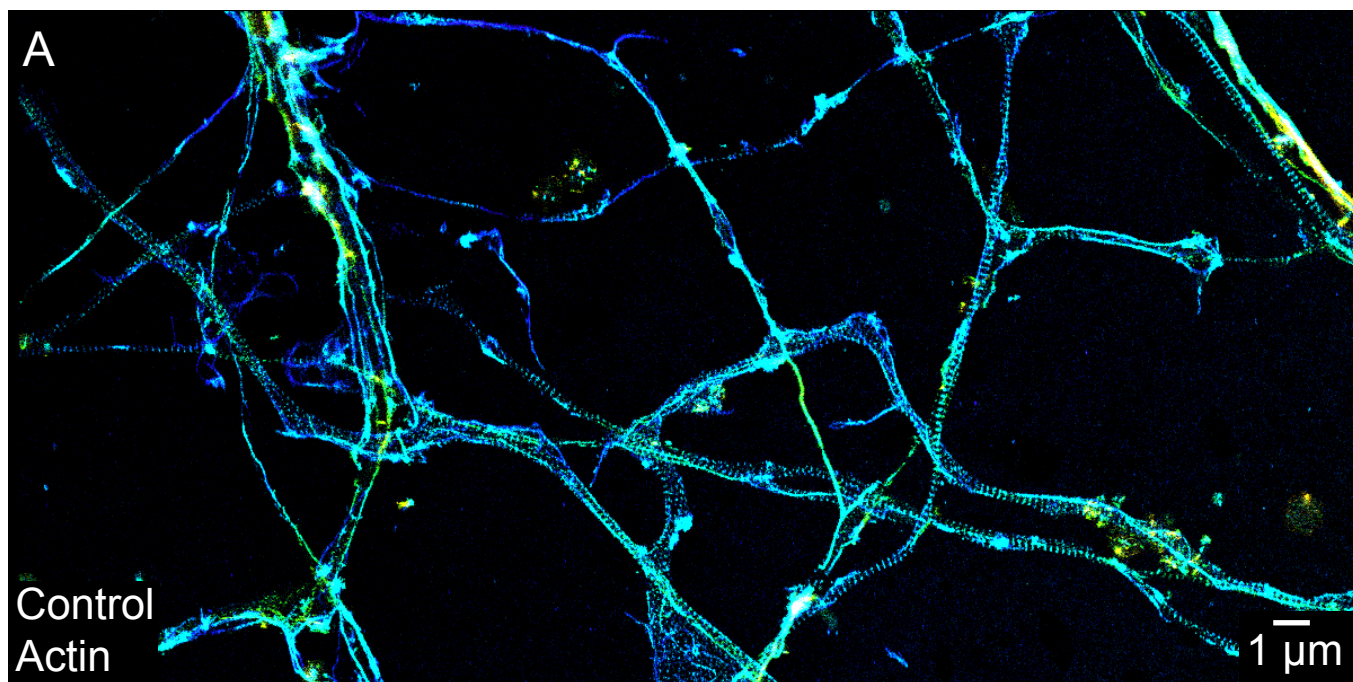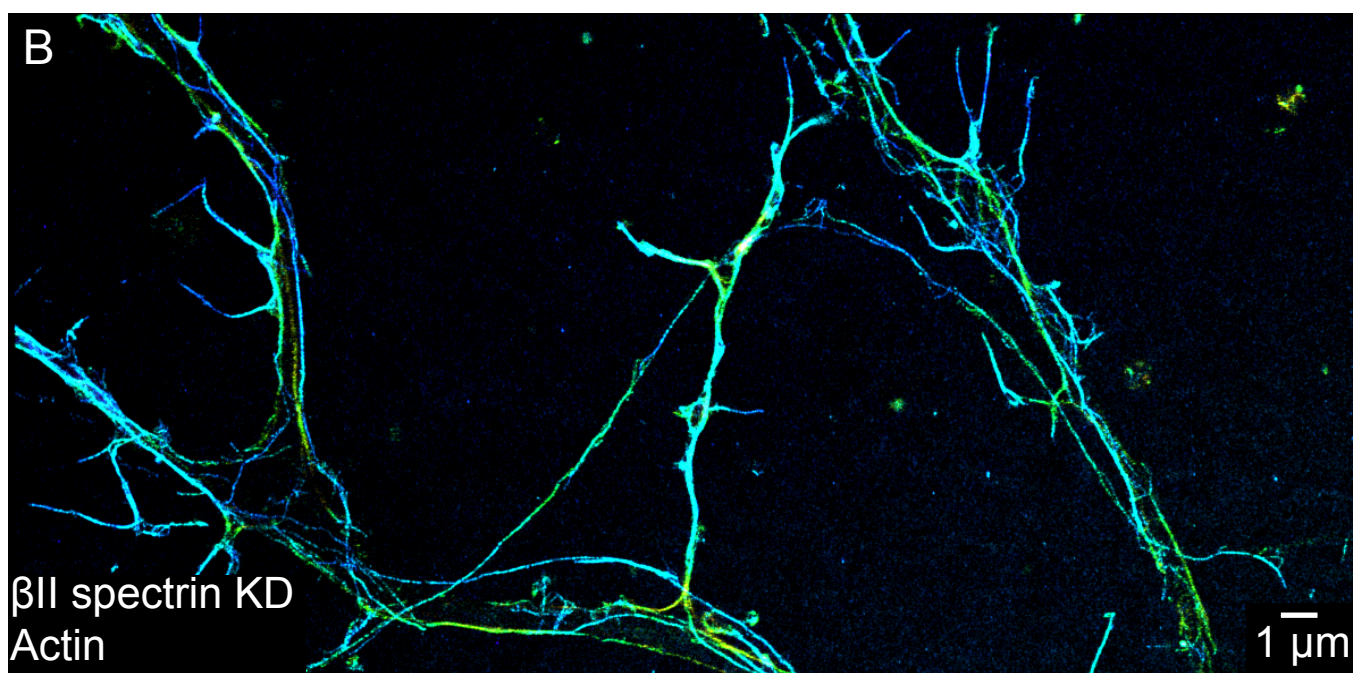

Supplement: supp [file elife-04581-supp-v1.zip › elife_poa_e04581_Figure_1_Figure_Supplement_3.pdf]

Figure 3 - Figure supplement 1

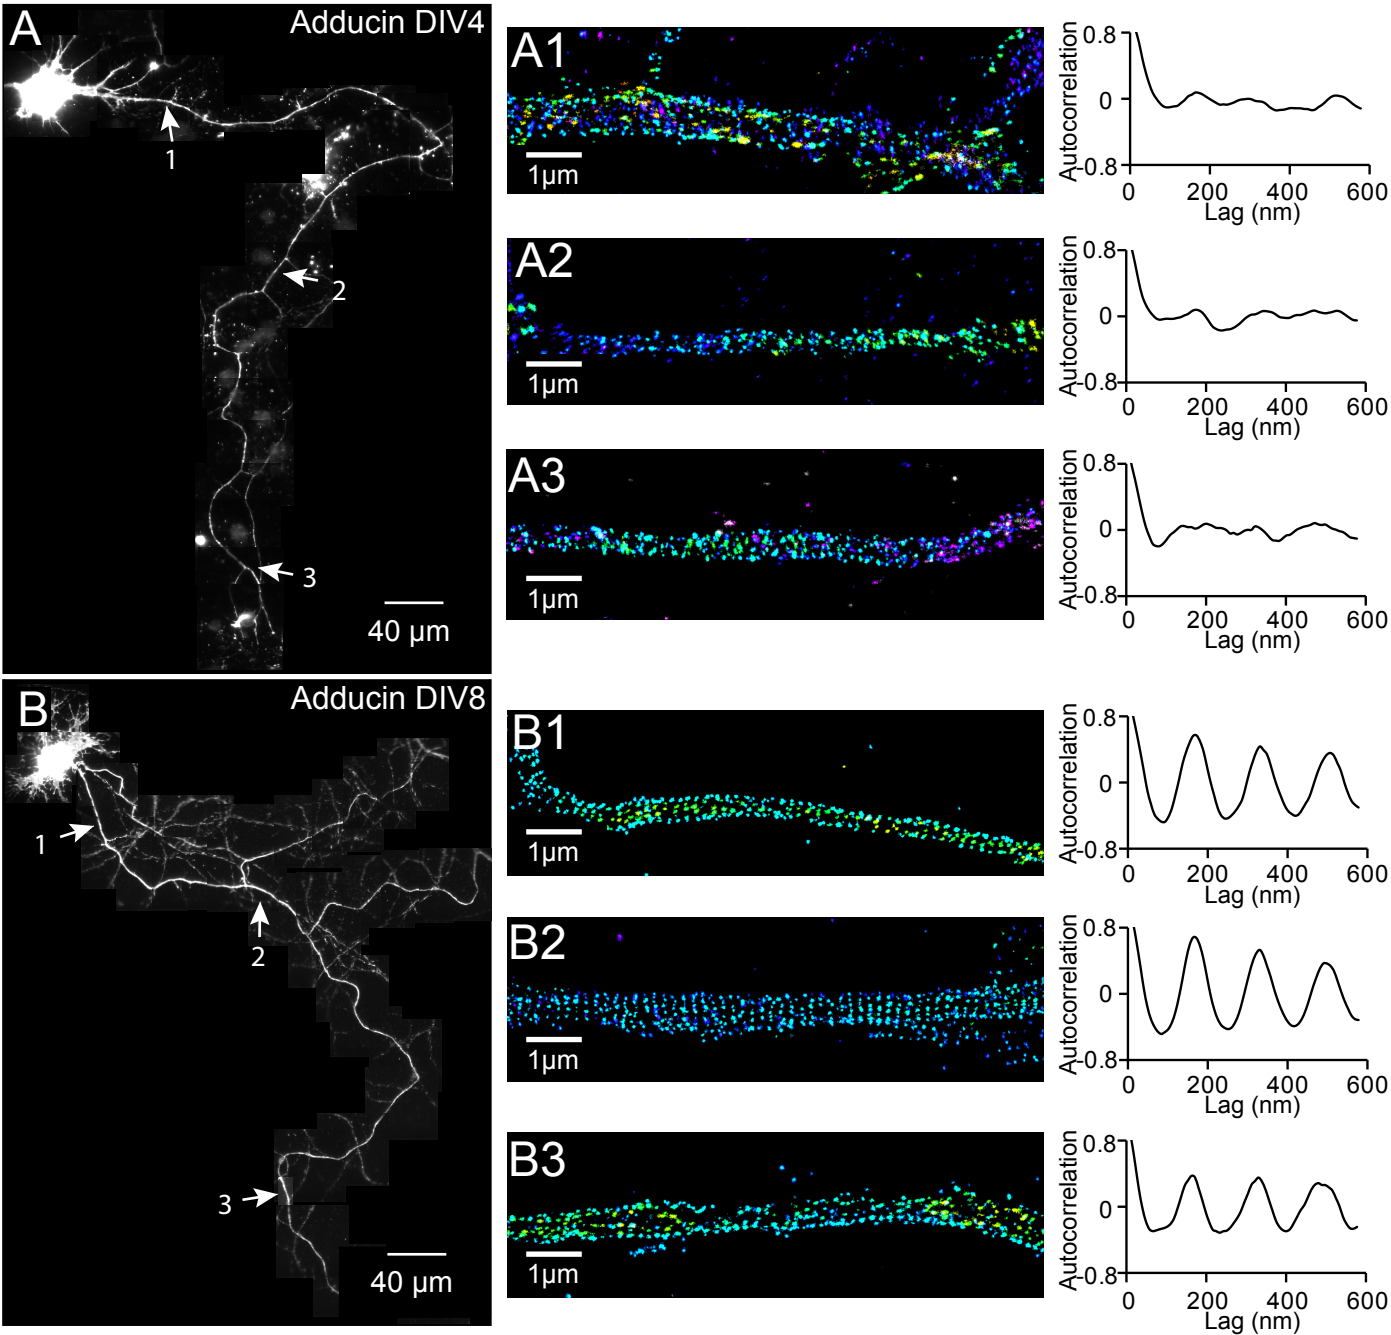

Supplement: supp [file elife-04581-supp-v1.zip › elife_poa_e04581_Figure_3_Figure_Supplement_1.pdf]

Figure 4 - Figure Supplement 1

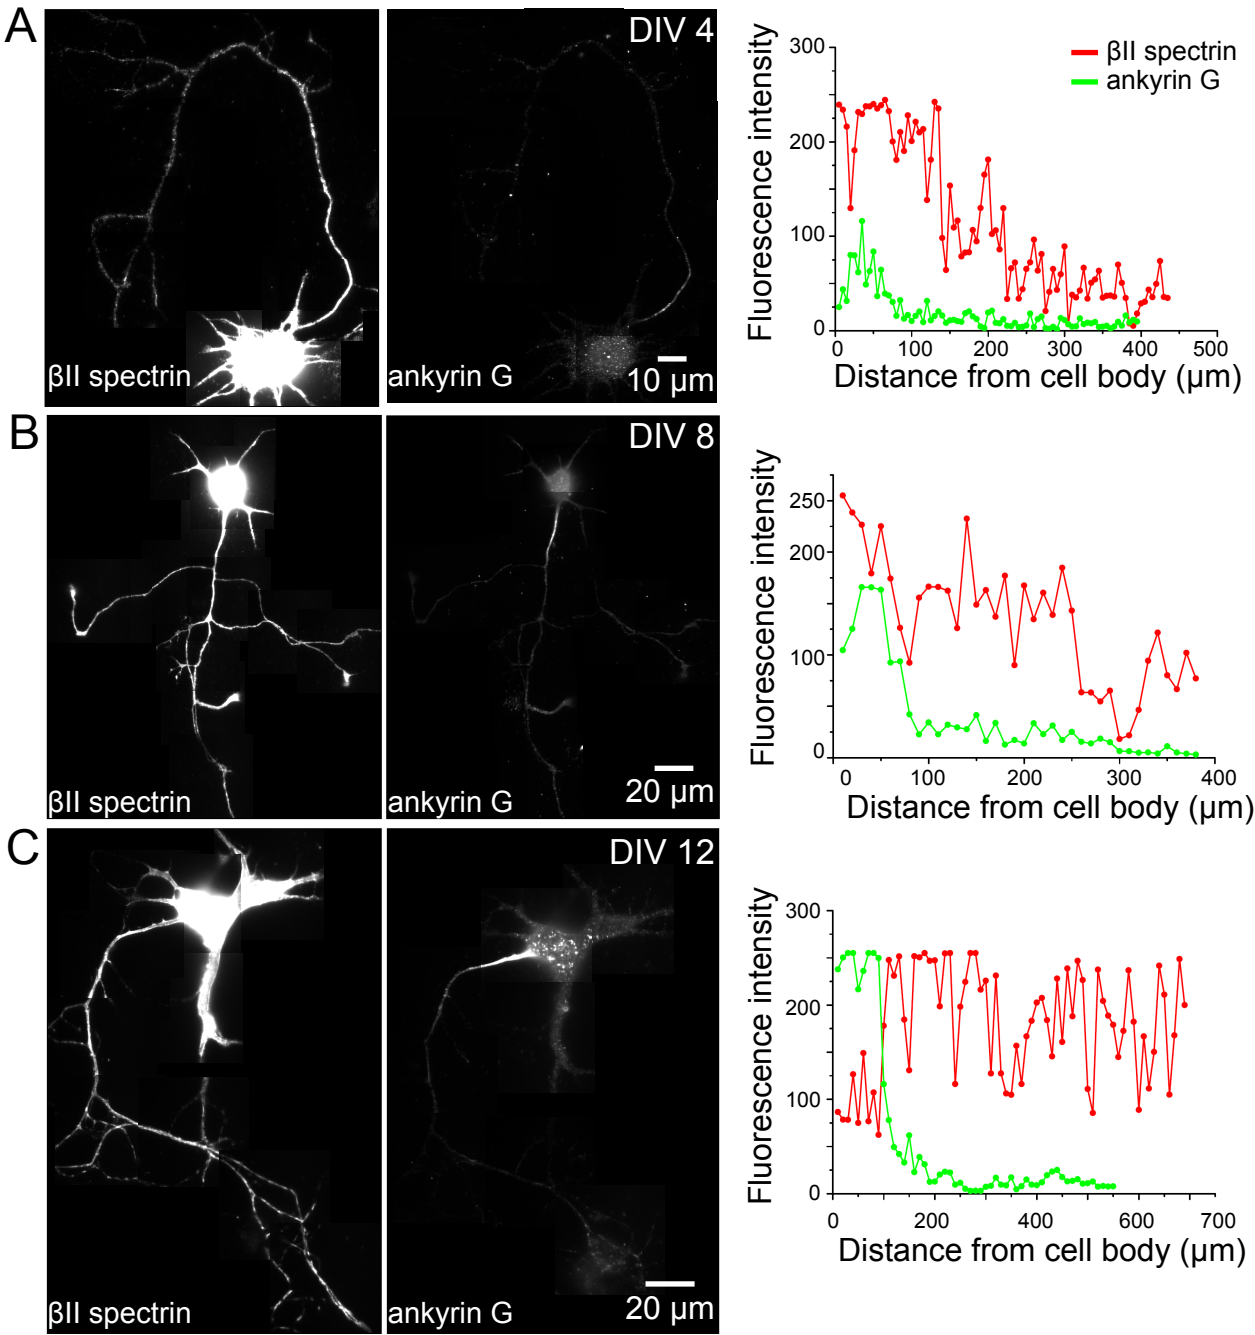

Supplement: supp [file elife-04581-supp-v1.zip › elife_poa_e04581_Figure_4_Figure_Supplement_1.pdf]

Figure 1 - Figure supplement 5

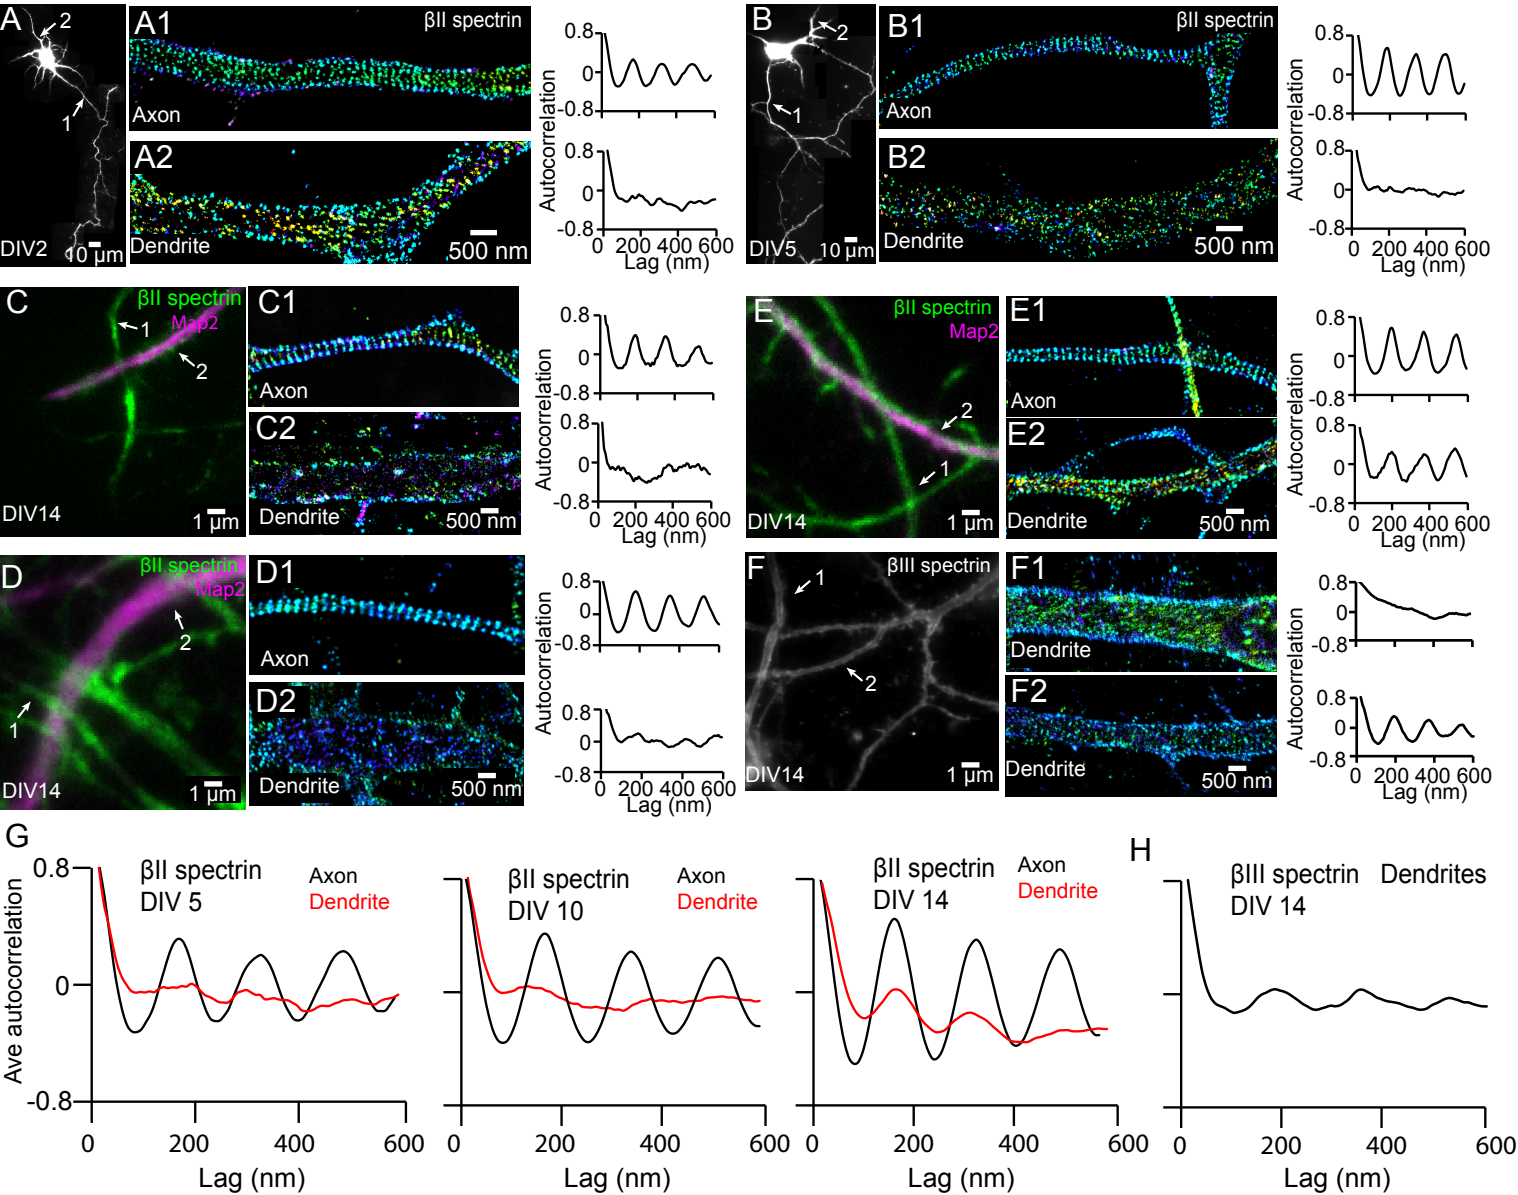

Supplement: supp [file elife-04581-supp-v1.zip › elife_poa_e04581_Figure_1_Figure_Supplement_5.pdf]

Figure 1 - Figure supplement 2

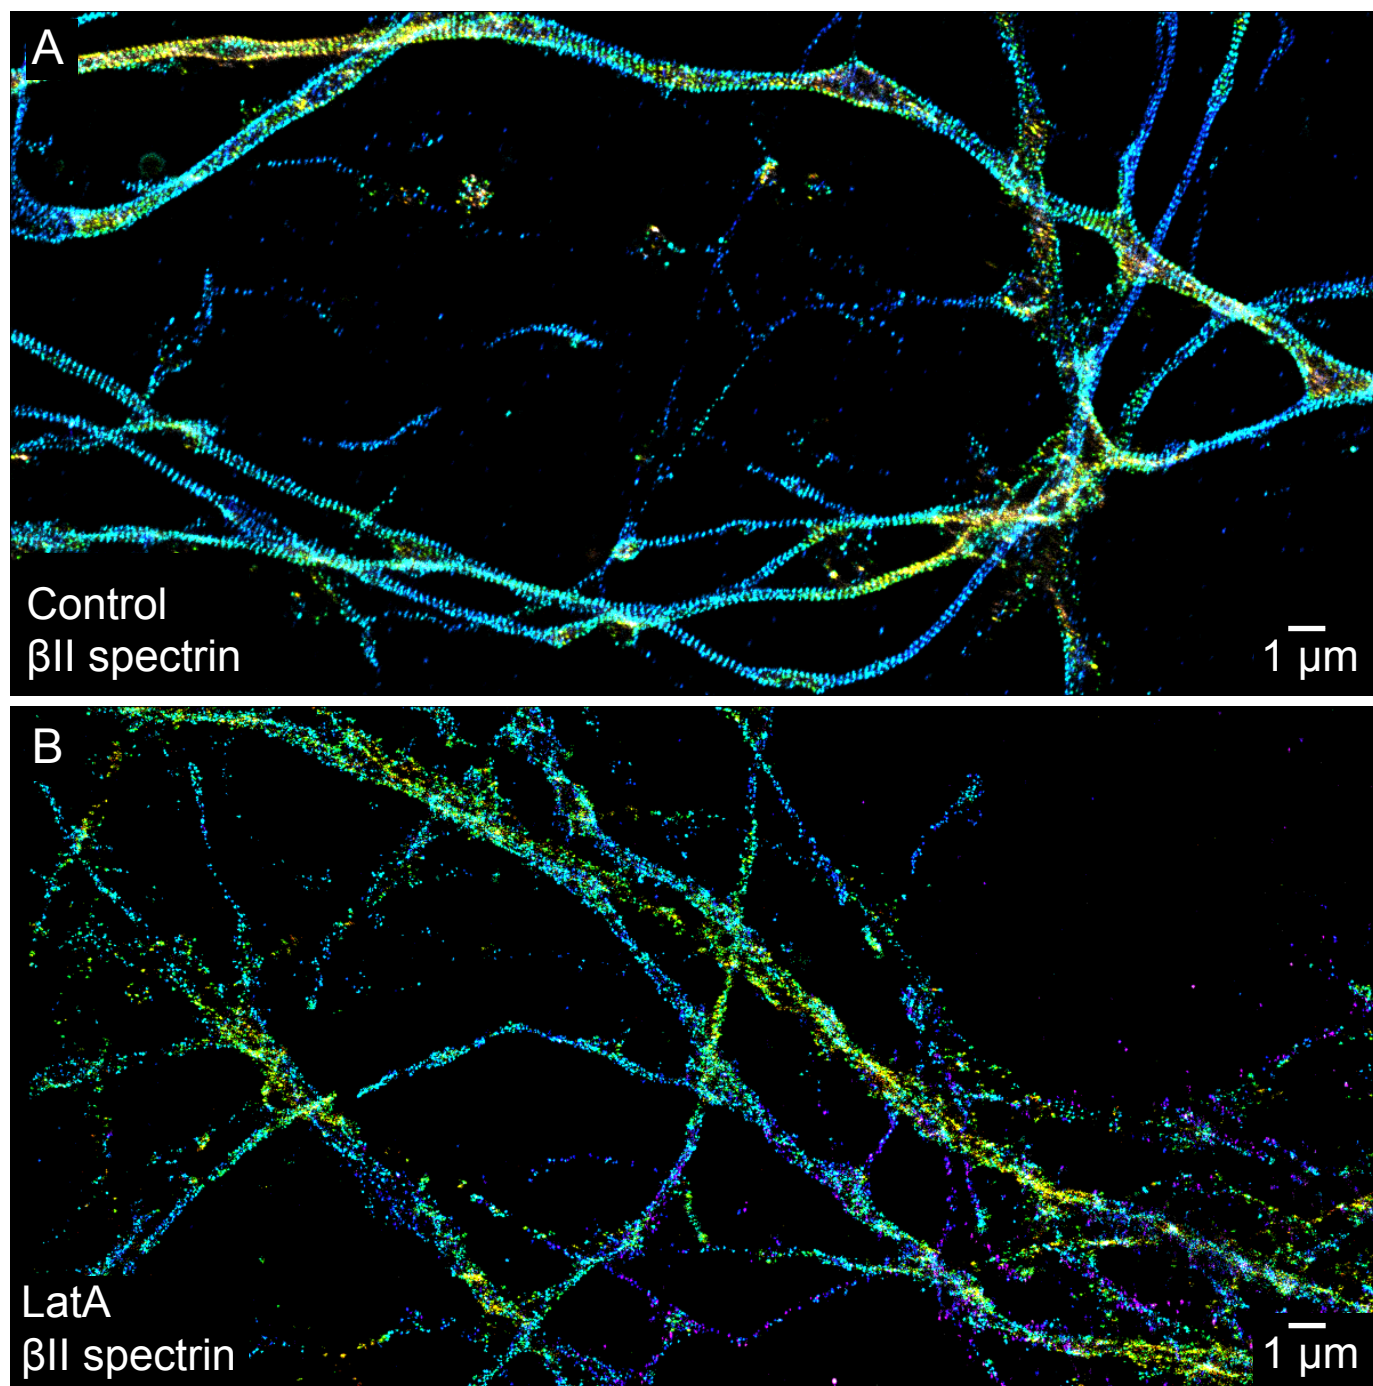

Supplement: supp [file elife-04581-supp-v1.zip › elife_poa_e04581_Figure_1_Figure_Supplement_2.pdf]

Figure 1 - Figure supplement 4

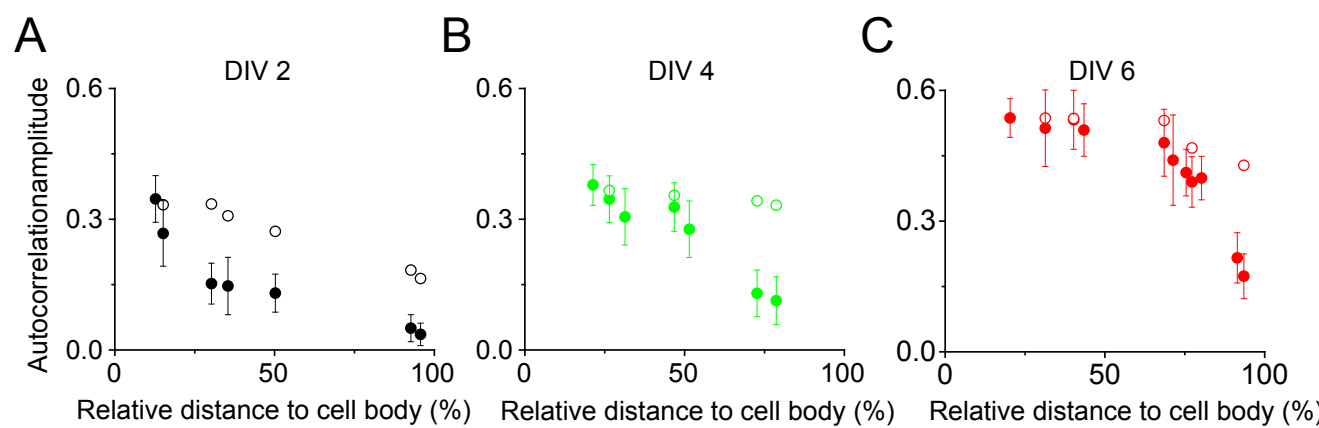

Supplement: supp [file elife-04581-supp-v1.zip › elife_poa_e04581_Figure_1_Figure_Supplement_4.pdf]

Figure 1 - Figure supplement 1

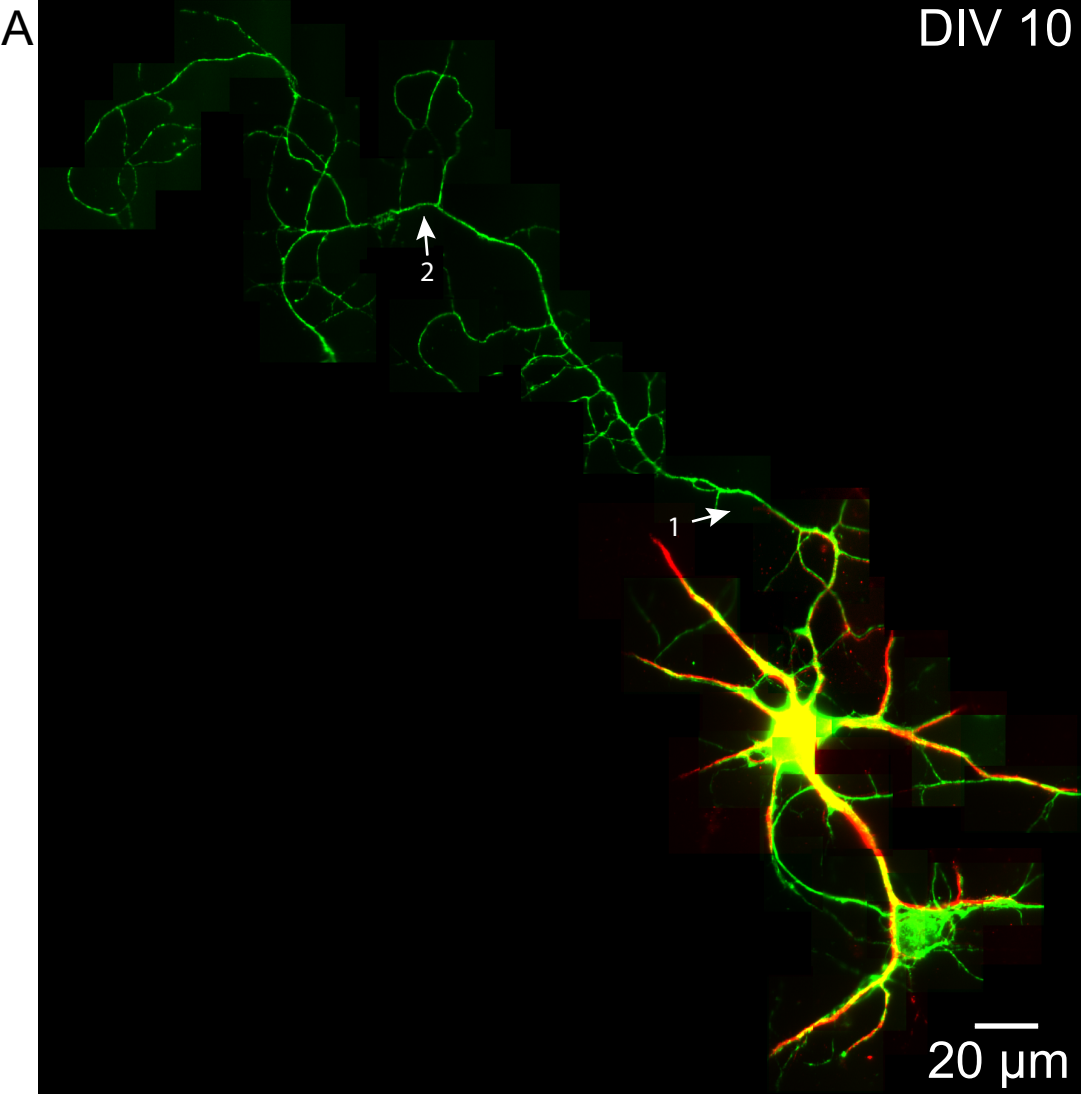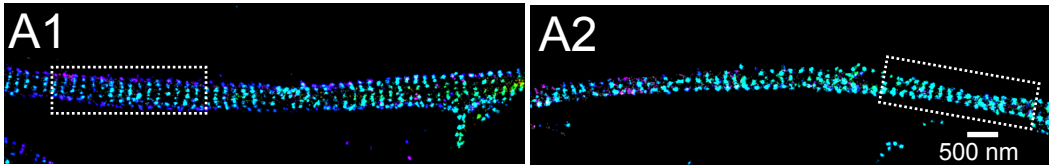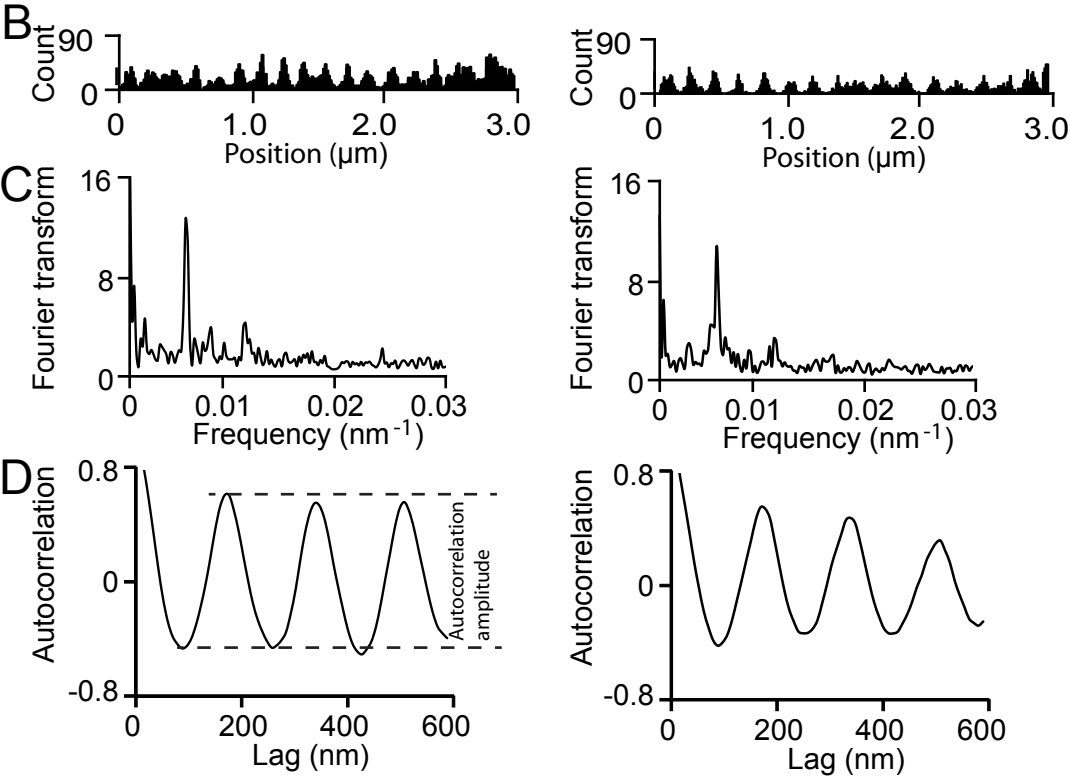

Supplement: supp [file elife-04581-supp-v1.zip › elife_poa_e04581_Figure_1_Figure_Supplement_1.pdf]

Figure 7- Figure supplement 1

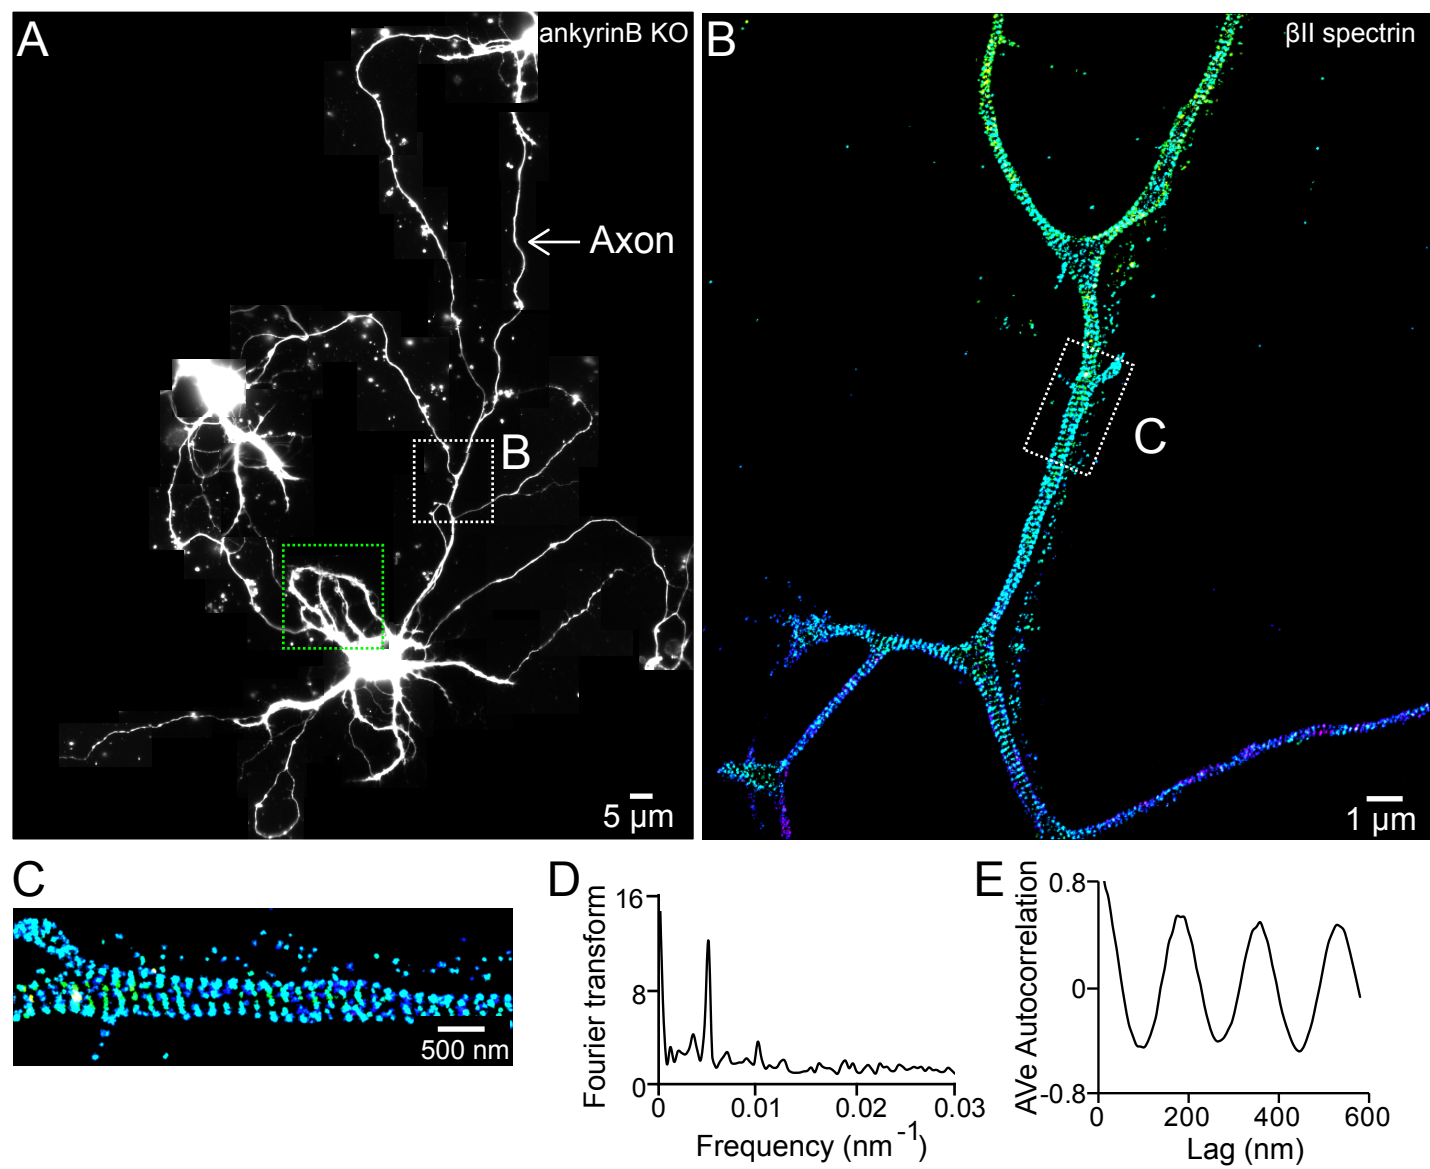

Supplement: supp [file elife-04581-supp-v1.zip › elife_poa_e04581_Figure_7_Figure_Supplement_1.pdf]

Figure 6 - Figure supplement 1

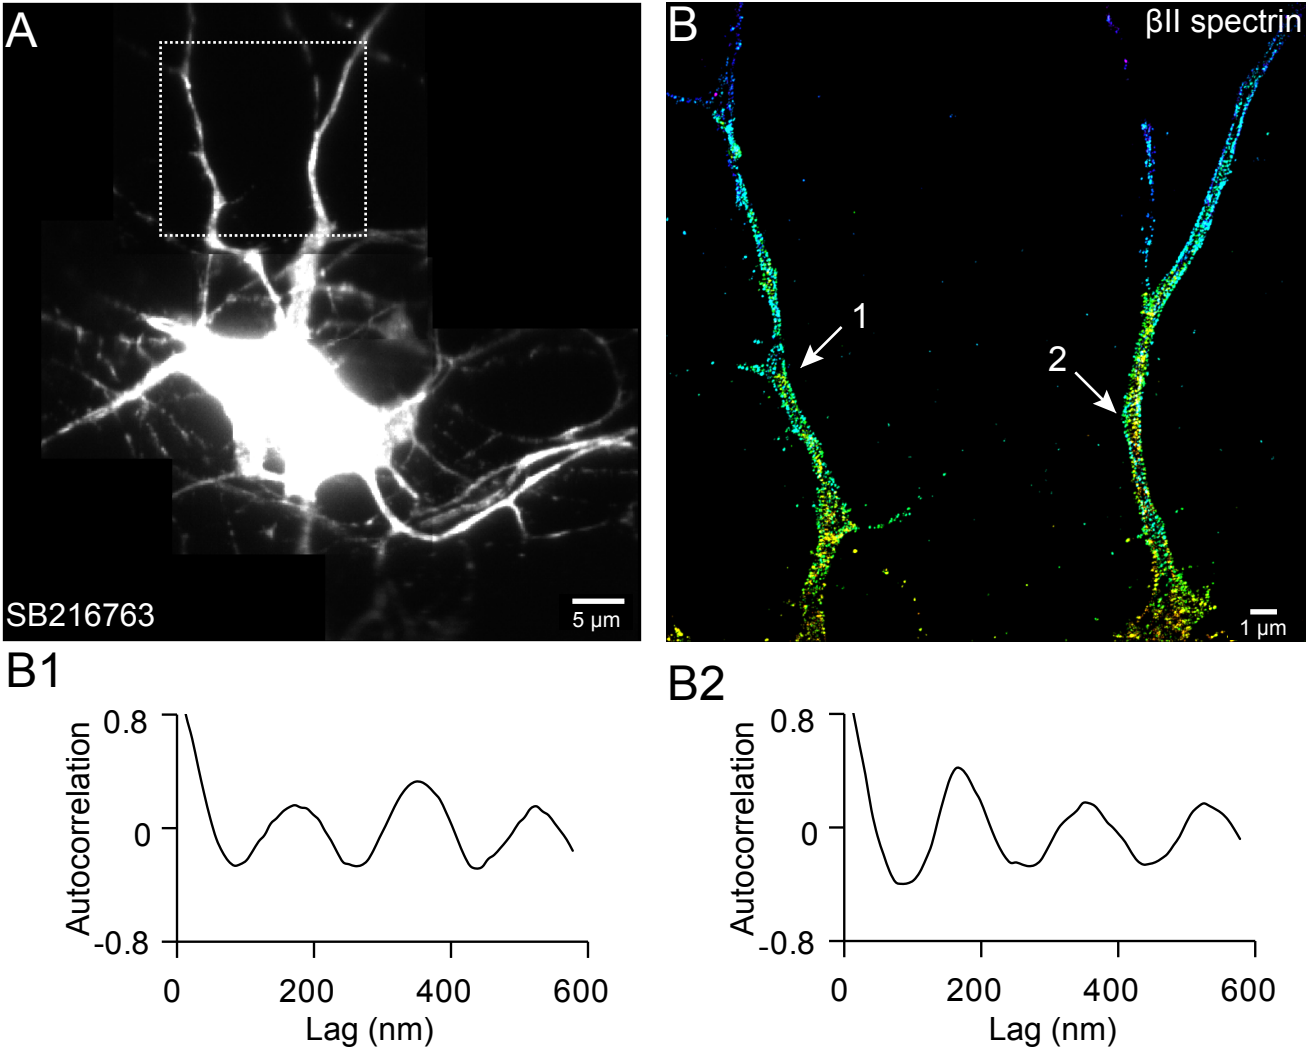

Supplement: supp [file elife-04581-supp-v1.zip › elife_poa_e04581_Figure_6_Figure_Supplement_1.pdf]

Figure 7 - Figure supplement 2

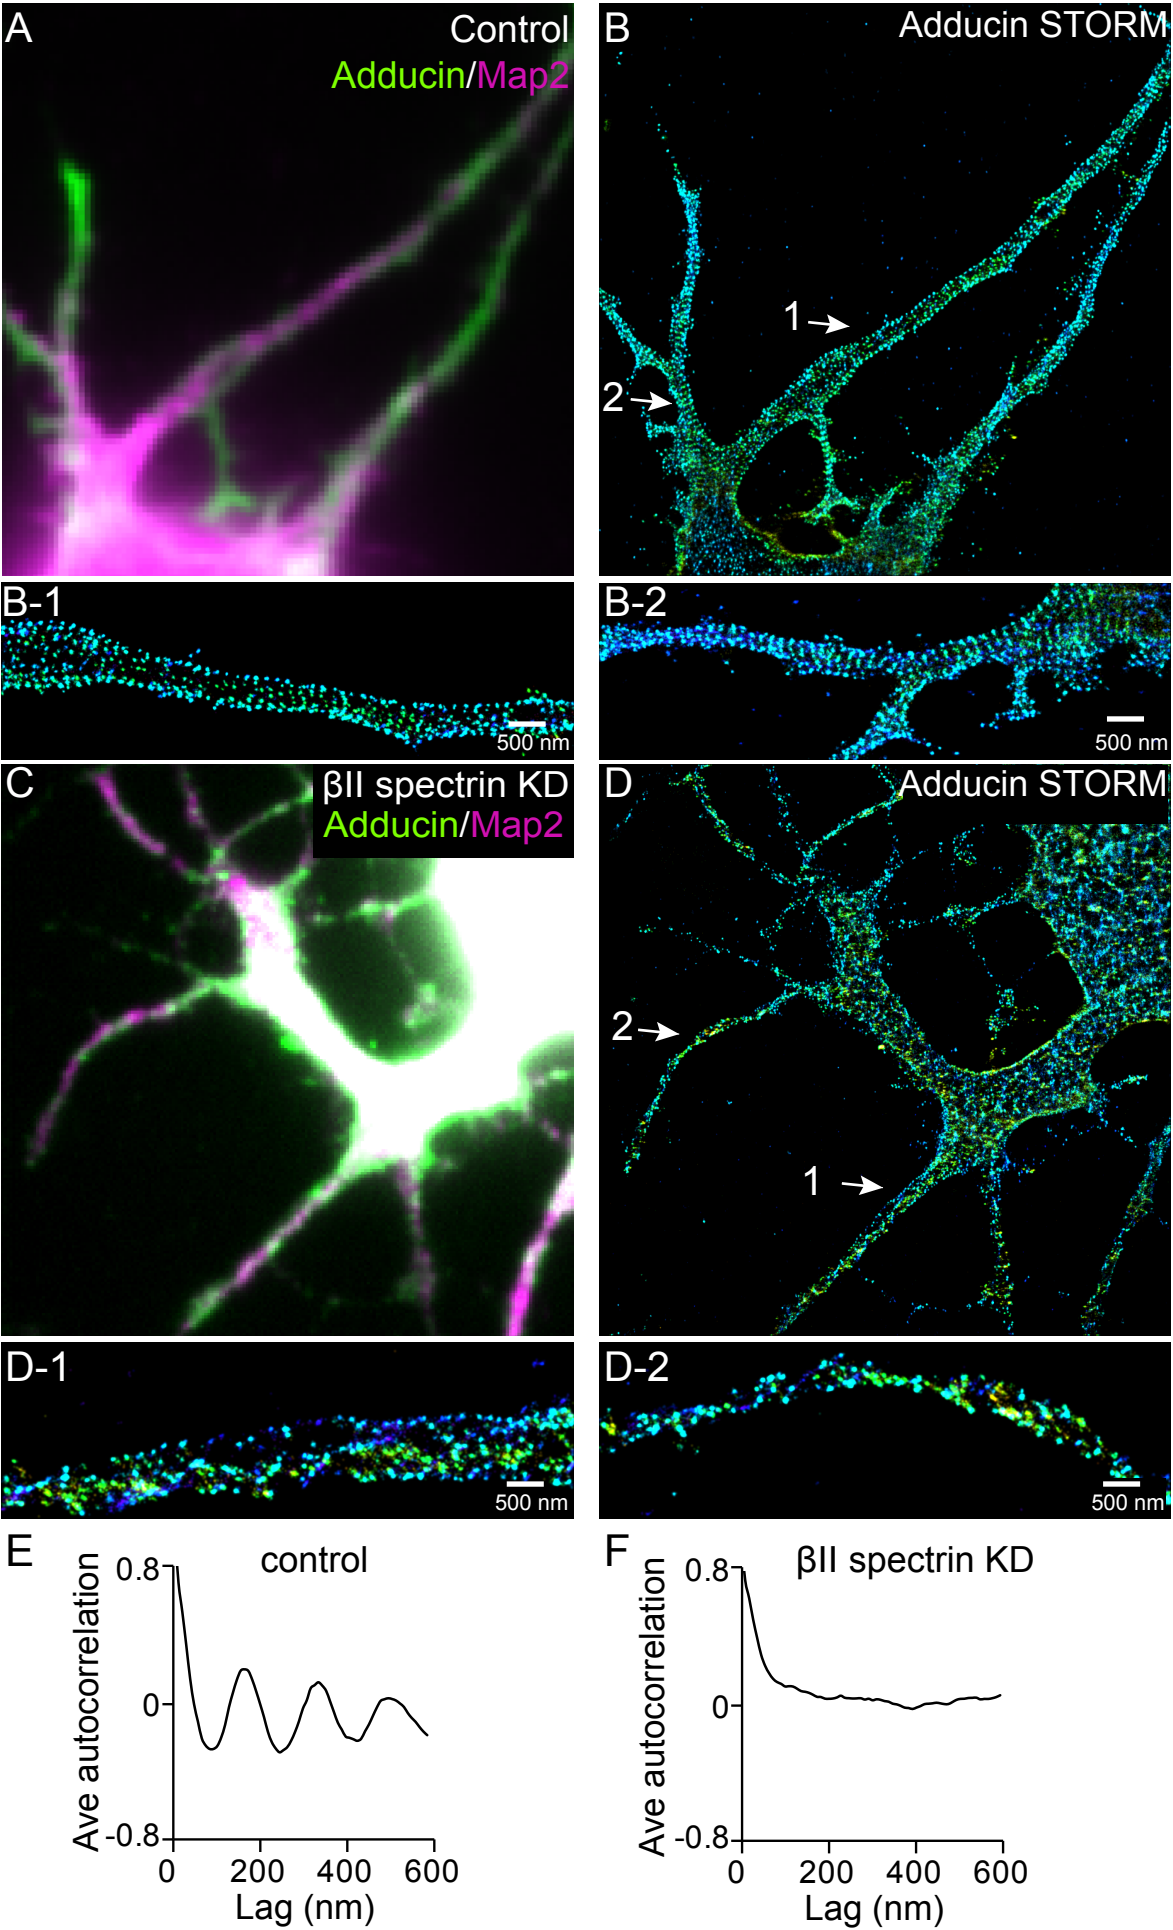

Supplement: supp [file elife-04581-supp-v1.zip › elife_poa_e04581_Figure_7_Figure_Supplement_2.pdf]

Figure 1- Figure supplement 6

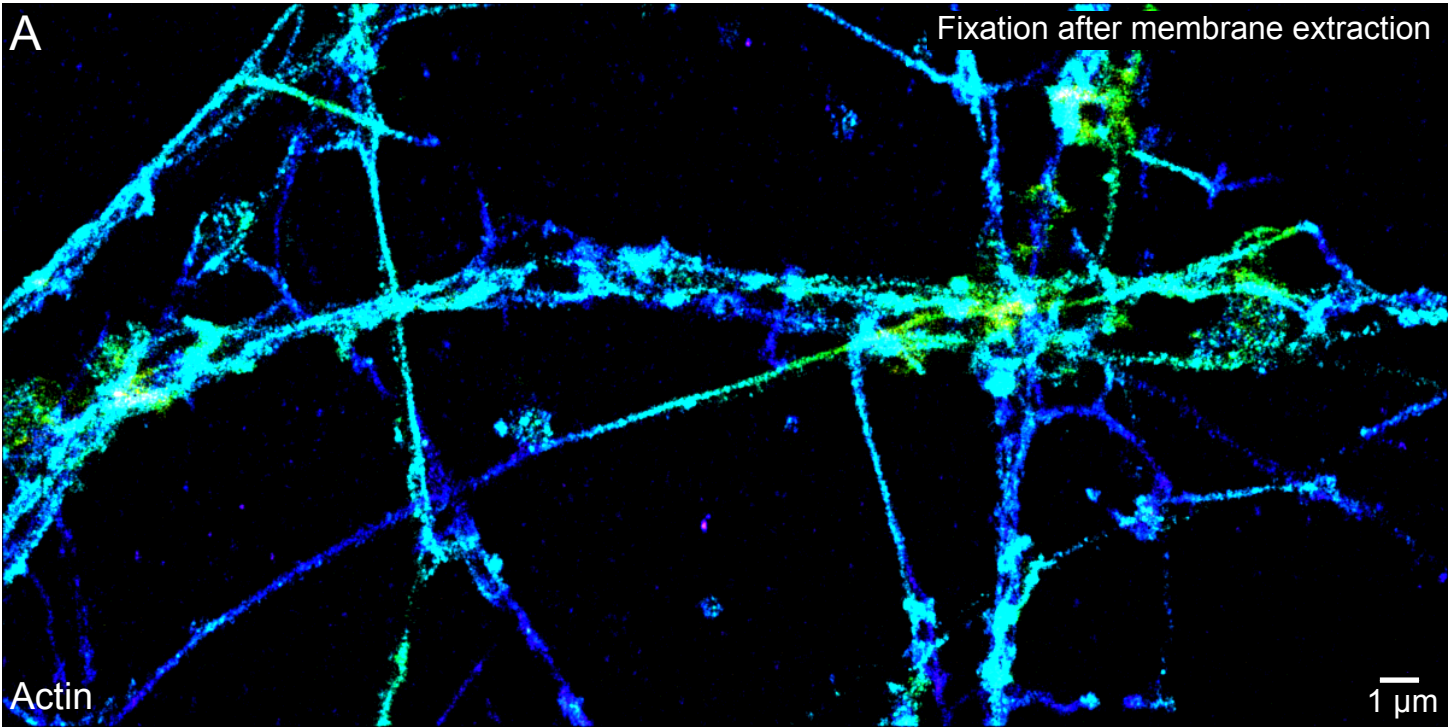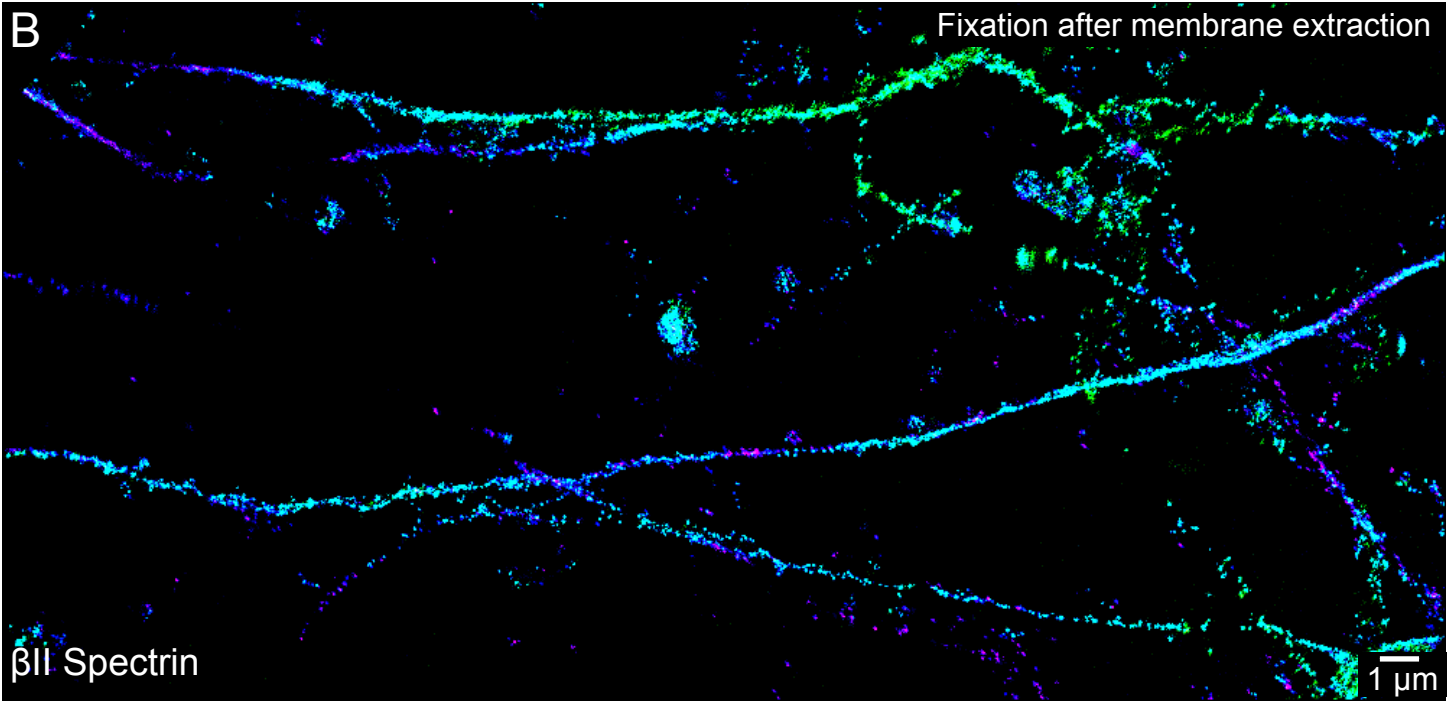

Supplement: supp [file elife-04581-supp-v1.zip › elife_poa_e04581_Figure_1_Figure_Supplement_6.pdf]

Figure 5 - Figure supplement 1

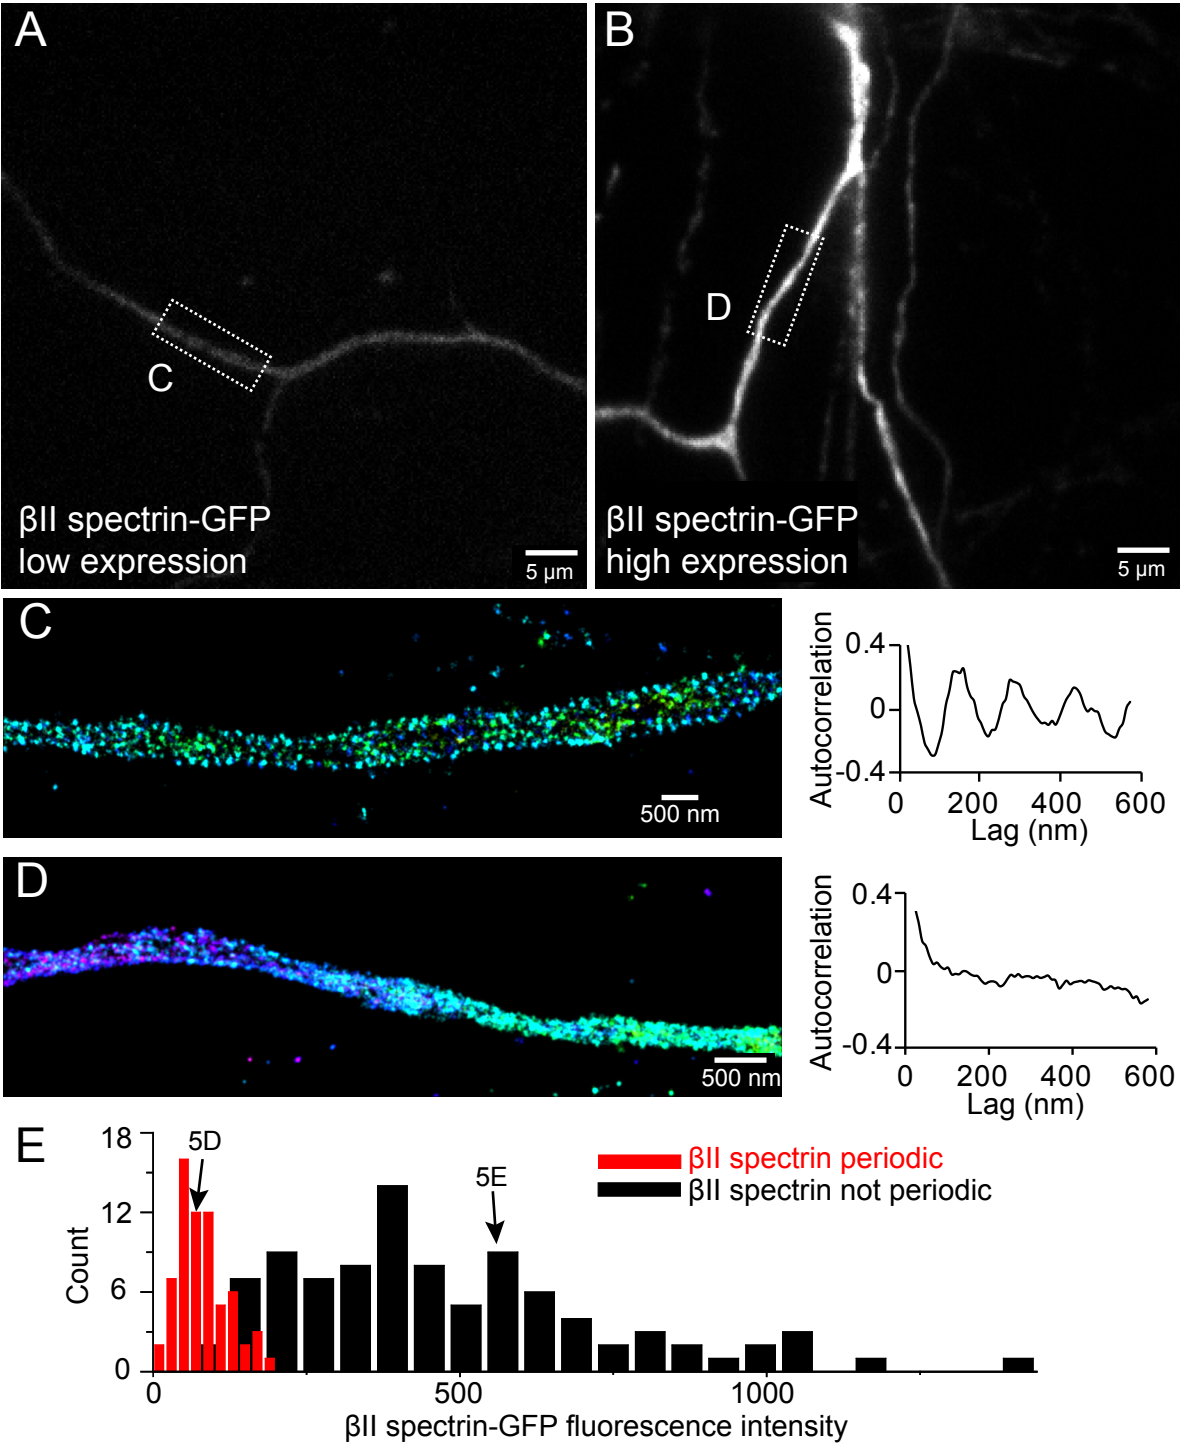

Supplement: supp [file elife-04581-supp-v1.zip › elife_poa_e04581_Figure_5_Figure_Supplement_1.pdf]
